# Supplementary material for: Concomitant Notch activation and p53 deletion trigger epithelial-to-mesenchymal transition and metastasis in mouse gut
Source: PubMed Central journal article supplement — Nat Commun. 2014 Oct 8;5:5005. doi: 10.1038/ncomms6005 (PMC4214431; doi:10.1038/ncomms6005), 2014-10-08
Supplement: ncomms6005-s1.pdf [file ncomms6005-s1.pdf]

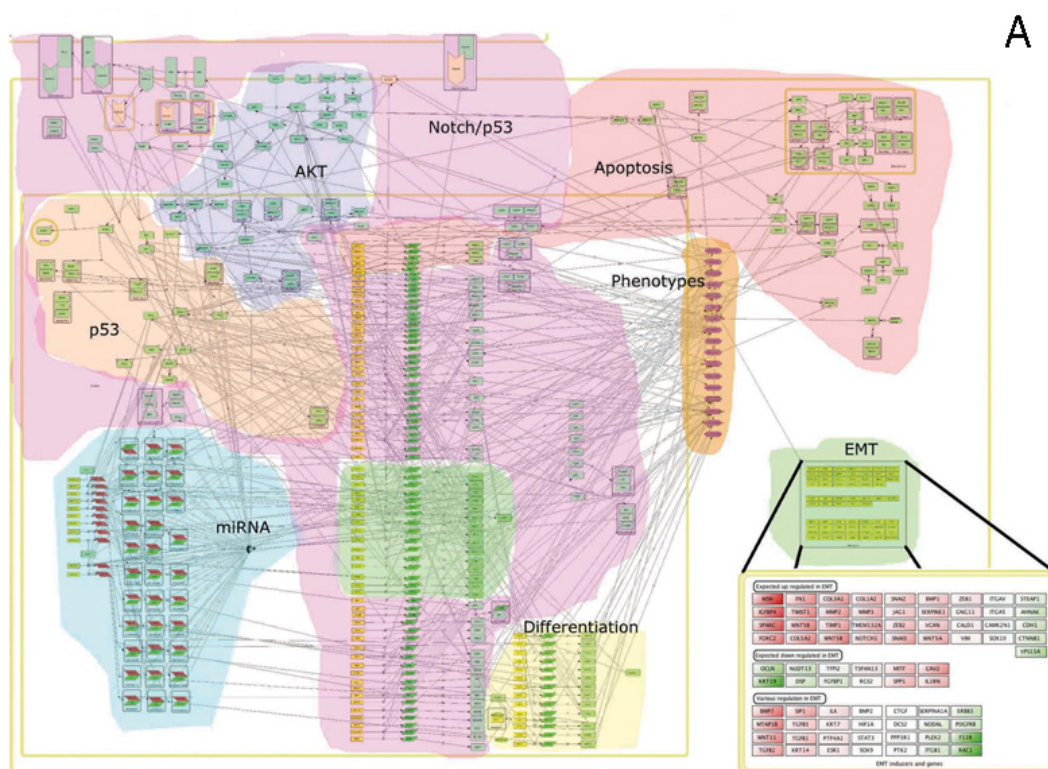

B

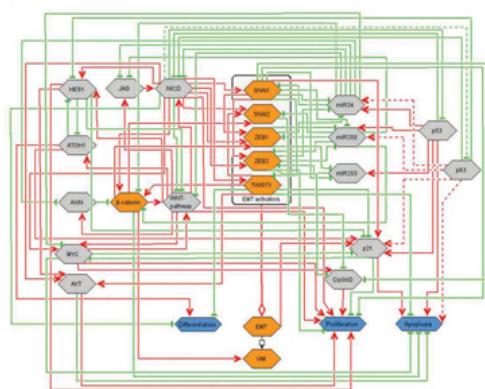

C

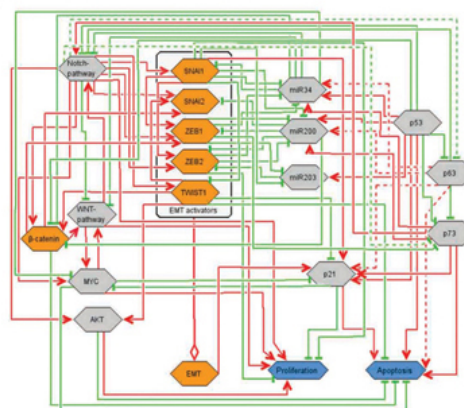

**Supplementary Figure 1: Models of Notch-p53-Wnt signalling network and cell phenotypes.**

A) Modular master model of signalling network of EMT regulation and cell phenotypes. Manually constructed network based on information extracted from 140 scientific papers. It contains about 400 chemical species. Regulatory circuits are formed by approximately 400 biochemical reactions with positive and negative regulatory loops. Modules: Apoptosis, AKT, Notch/p53, p53 specific, EMT, miRNAs, Differentiation and Phenotypes. The Notch-p53-Wnt signalling network is browsable in NaviCell tool for signaling maps navigation at ([https://navicell.curie.fr/pages/signalling\\_network\\_empt\\_regulation\\_description.html](https://navicell.curie.fr/pages/signalling_network_empt_regulation_description.html))

B) Model reduction level 1.

C) Model reduction level 3

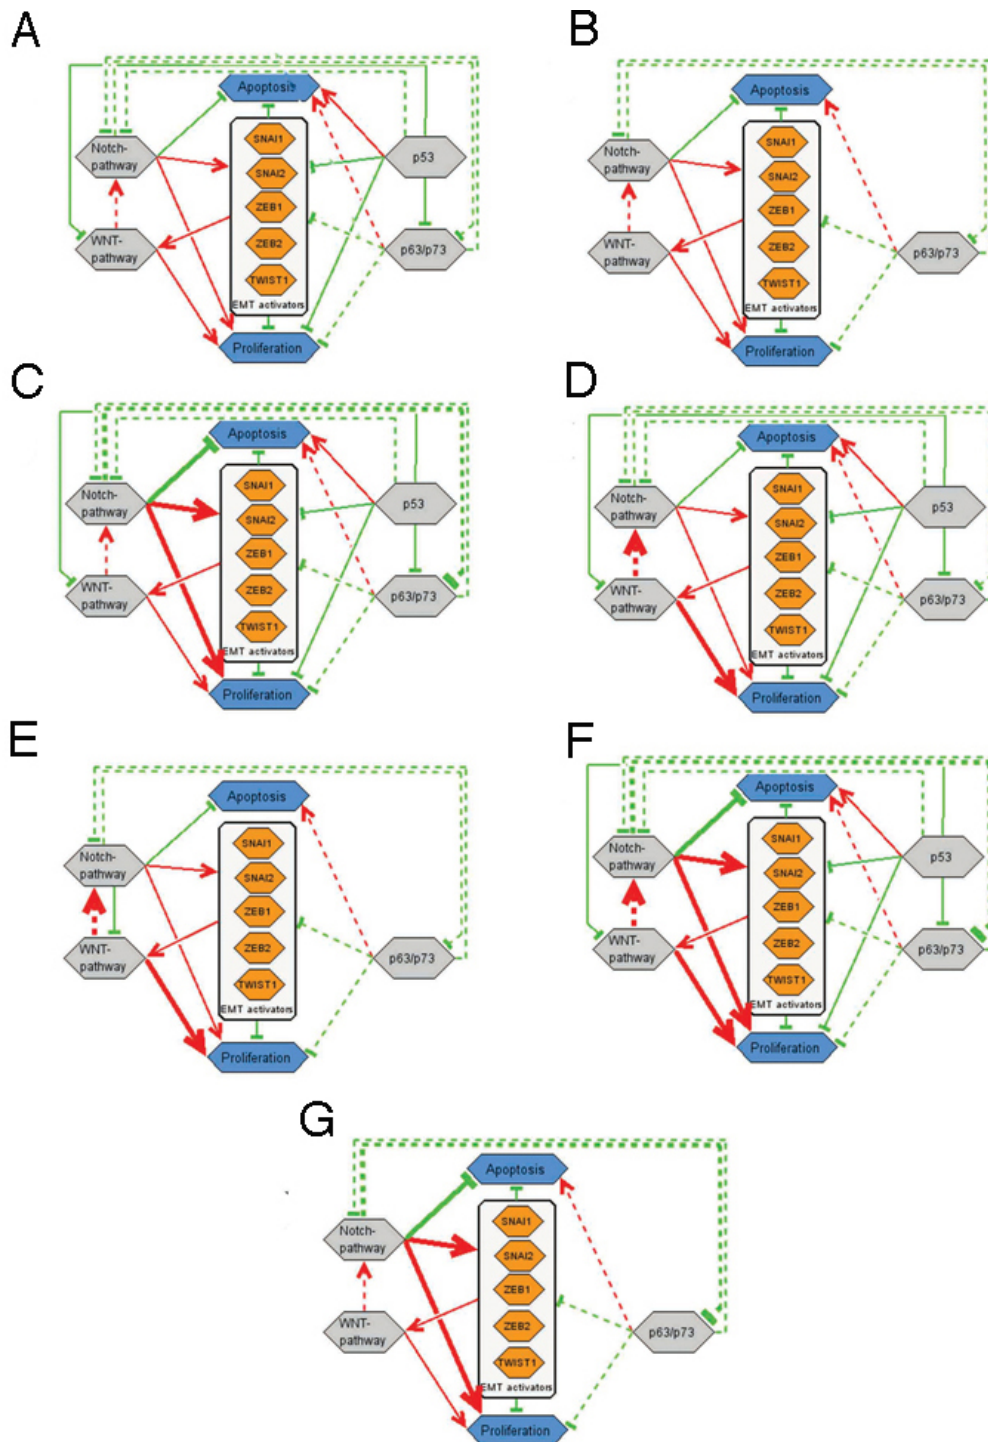

**Supplementary Figure 2: Molecular mechanisms of wild type and mutants predicted by signalling network analysis**

Molecular mechanism of wild type and single and double mutants predicted by signalling network analysis shown on a level 3 model reduction-signalling network of Notch-p53-Wnt with cell phenotypes: Proliferation, EMT and Apoptosis. A) WT, B) *p53*<sup>-/-</sup> mutant, C) *NICD* mutant, D) *Apc*<sup>-/-</sup> mutant, E) *Apc*<sup>-/-</sup>, *p53*<sup>-/-</sup> mutant, F) *NICD/Apc*<sup>-/-</sup> mutant, G) *NICD/p53*<sup>-/-</sup> mutant.

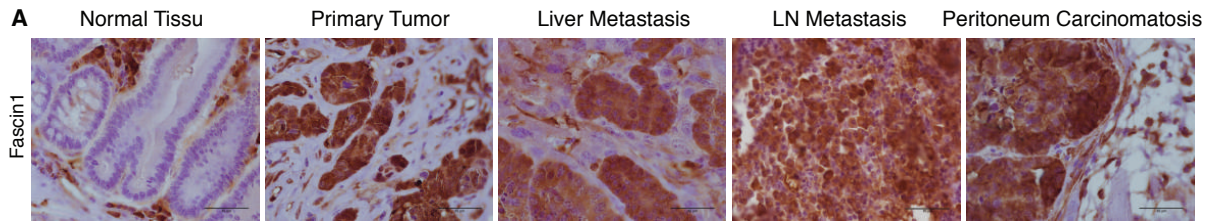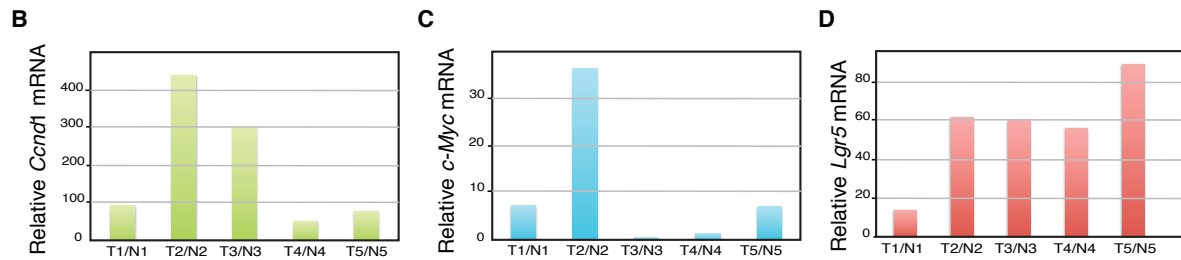

**E**

| Chr   | Start    | End      | Ref | Alt | Gene          | Exon   | Exonic Function      | Amino Acid Change                                                              | 2829 | 2837                      | 3191                      | 3599                      | 4944 | 4962 | 5336                      | 6033                      |
|-------|----------|----------|-----|-----|---------------|--------|----------------------|--------------------------------------------------------------------------------|------|---------------------------|---------------------------|---------------------------|------|------|---------------------------|---------------------------|
| chr9  | 1,21E+08 | 1,21E+08 | C   | T   | <b>Cttnb1</b> | exon3  | nonsynonymous SNV    | Cttnb1.NM_001165902:exon3:c.C98Tp.S33F, Cttnb1.NM_007614:exon3:c.C98Tp.S33F*   |      |                           | Somatic: T=38.6% / N=0.1% |                           |      |      |                           |                           |
| chr9  | 1,21E+08 | 1,21E+08 | C   | T   | <b>Cttnb1</b> | exon3  | nonsynonymous SNV    | Cttnb1.NM_001165902:exon3:c.C122Tp.T41I, Cttnb1.NM_007614:exon3:c.C122Tp.T41I* |      |                           |                           |                           |      |      |                           | Somatic: T=35.4% / N=0.2% |
| chr18 | 34306373 | 34306373 | A   | A   | <b>Apc</b>    | exon14 | frameshift insertion | Apc:NM_007462:exon14:c.1731_1732insA:p.V577fs                                  |      | Somatic: T=62.3% / N=3.5% |                           |                           |      |      |                           |                           |
| chr18 | 34313127 | 34313127 | C   | A   | <b>Apc</b>    | exon16 | stopgain SNV         | Apc:NM_007462:exon16:c.C3075A:p.Y1025X                                         |      |                           |                           | Somatic: T=78.9% / N=0.3% |      |      |                           |                           |
| chr18 | 34313620 | 34313620 | A   | A   | <b>Apc</b>    | exon16 | frameshift insertion | Apc:NM_007462:exon16:c.3568_3569insA:p.Q1190fs                                 |      |                           |                           |                           |      |      | Somatic: T=39.5% / N=3.5% |                           |

\* these two mutations have been reported in Human colorectal Cancer according to the Catalogue of somatic mutations in cancer (<http://cancer.sanger.ac.uk/cancergenome/projects/cosmic>)

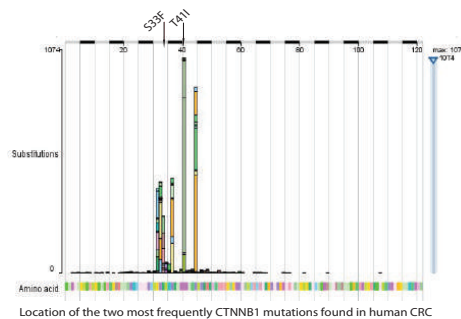

### Supplementary Figure 3: Wnt pathway is altered in *NICD/p53*<sup>-/-</sup> primary tumours and metastases.

A) Immunohistochemical staining of Fascin1 showing its activation in cancer cells compared with normal epithelial tissues. Scale bars= 40  $\mu$ m

B) C) and D) Quantification by real time qPCR of the Wnt target genes *Ccnd1* (B), *c-Myc* (C) and *Lgr5* (D) in 5 independent *NICD/p53*<sup>-/-</sup> primary tumours relative to adjacent normal tissue, showing up-regulation of Wnt-target genes in the tumours. Data were normalized using *b2-microglobulin* as reference gene.

E) Analysis by exome sequencing for the presence of mutations in *Cttnb1* and *Apc* gene in 8 independent *NICD/p53*<sup>-/-</sup> primary tumours. The two mutations labelled with \* have been reported as two hot spots of CTNNB1 mutations in human colorectal cancer according to the catalogue of somatic mutations in cancer (COSMIC, <http://www.sanger.ac.uk/cosmic>).

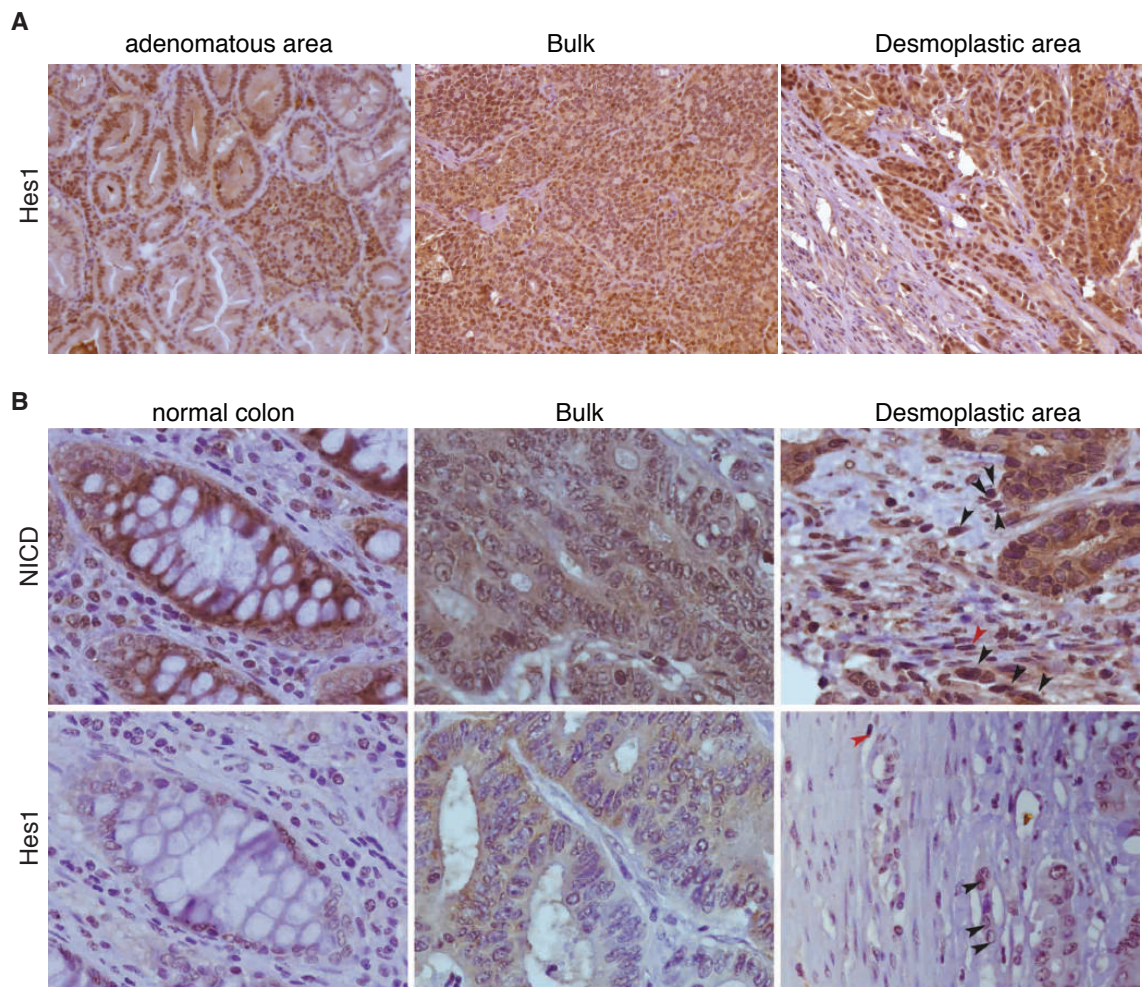

**Supplementary Figure 4: Notch signals are activated in EMT-like cells invading stroma of mouse and human CCR.**

A) Hes1 staining on NICD/p53<sup>-/-</sup> tumours confirms activation of Notch in the tumour cells.

B) Immunohistochemical stainings of NICD and Hes1 in human colorectal adenocarcinomas and adjacent normal tissues. *Upper panels*: NICD is lightly expressed in the nuclei of normal epithelial cells and in the bulk of the tumour. It is overexpressed in invading tumour cells undergoing EMT-like processes. *Lower panels*: nuclear expression of Hes1 in normal epithelial cells is lost in the bulk of the adenocarcinoma but turns back on in cells exiting the tumour in the desmoplastic area. Black arrows pinpoint isolating cells with an epithelial morphology; red arrows show isolated cells with fibroblast morphology.

**Supplementary Table 1: Pathological characteristics of tumours in *NICD/p53*<sup>-/-</sup> mice**

A) Histopathological analysis of 103 H&E primary tumours arising from 30 *NICD/p53*<sup>-/-</sup> mice analysing the type, the grade and the invasion status of the tumours. FD=focal dysplasia; MA= microadenoma; AD= adenoma; ISC= in situ carcinoma; MADK= microadenocarcinoma; ADK= adenocarcinoma. WD= well differentiated; MD= moderately differentiated; PD= poorly differentiated. pT0= no invasion; pT1= muscularis mucosa invasion; pT2= muscularis invasion; pT3= serosa invasion. Grading was determined for the 91 malignant tumours (CIS, MADK and ADK).

B) Characterisation of the most aggressive primary tumour, defined by its invasiveness. 17 over 30 analyzed animals have developed metastasis. 96.7% of animals develop adenocarcinoma invading the serosa. \*: the overall vascular invasion is 9.7% (10/103 tumours), however 2 (2.1%) of the tumours are well-differentiated with low invasive potential and a further 2 presented poor differentiation with moderate invasion. Vascular invasion was not determined on 5 cases due to the exclusive presence of tumour cells on the examined slides.

C) Metastasis quantification and determination of metastasis differentiation status in the 30 animals.

| a- Primary tumours (n = 103)                |                         |         |                        |      |          |            |             |          |                   |               |
|---------------------------------------------|-------------------------|---------|------------------------|------|----------|------------|-------------|----------|-------------------|---------------|
| Type                                        |                         |         | Grade                  |      |          | Invasion   |             |          |                   |               |
| FD                                          | 5                       |         | WD                     | 30   |          | pT0        | 20          |          |                   |               |
| MA                                          | 5                       |         | MD                     | 25   |          | pT1        | 12          |          |                   |               |
| AD                                          | 2                       |         | PD                     | 36   |          | pT2        | 11          |          |                   |               |
| CIS                                         | 8                       |         |                        |      |          | pT3        | 54          |          |                   |               |
| MADK                                        | 3                       |         |                        |      |          |            |             |          |                   |               |
| ADK                                         | 80                      |         |                        |      |          |            |             |          |                   |               |
| b- Most aggressive tumour per mice (n = 30) |                         |         |                        |      |          |            |             |          |                   |               |
| Location                                    | Size in mm <sup>2</sup> |         | Grade                  |      | Invasion |            | Desmoplasia |          | Vascular invasion |               |
| Duod                                        | 2                       | <100    | 9                      | WD   | 2        | pT0        | 0           | Low      | 11                | observed 3/30 |
| Jej                                         | 19                      | 100-200 | 3                      | MD   | 8        | pT1        | 1           | Moderate | 6                 |               |
| Ileum                                       | 8                       | >200    | 17                     | PD   | 20       | pT2        | 0           | Severe   | 11                |               |
| Colon                                       | 1                       |         |                        |      |          | pT3        | 29          |          |                   |               |
| c- Metastases per mice (n = 30)             |                         |         |                        |      |          |            |             |          |                   |               |
| Lymph node                                  |                         |         | Distant organs (Liver) |      |          | Carcinosis |             |          |                   |               |
| observed                                    | 6/30                    |         | observed               | 3/30 |          | observed   | 15/30       |          |                   |               |
| WD                                          | 0                       |         | WD                     | 0    |          | WD         | 2           |          |                   |               |
| MD                                          | 2                       |         | MD                     | 1    |          | MD         | 3           |          |                   |               |
| PD                                          | 4                       |         | PD                     | 2    |          | PD         | 10          |          |                   |               |

## Supplementary Table 2: EMT array results with colour code and expected expression in EMT

For each gene we report the result of Student's t-test, used to compare gene expression in tumour versus normal samples. The t-test values have been colour-coded with red indicating high relative expression in tumours versus samples and green indicating low relative expression. The last column specifies the expected expression of the gene during EMT.

| HUGO     | t-score | p-value | Expected EMT expression |
|----------|---------|---------|-------------------------|
| Msn      | 4.723   | 0.007   | Exp-EMT-up              |
| Tcf7l1   | 3.686   | 0.032   | NA                      |
| Igfbp4   | 3.669   | 0.034   | Exp-EMT-up              |
| Sparc    | 3.412   | 0.018   | Exp-EMT-up              |
| Tcf4     | 2.949   | 0.059   | Exp-EMT-up              |
| Bmp7     | 2.787   | 0.068   | NA                      |
| Foxc2    | 2.615   | 0.079   | Exp-EMT-up              |
| Wnt5b    | 2.496   | 0.087   | Exp-EMT-up              |
| Mtap1b   | 2.454   | 0.09    | NA                      |
| Twist1   | 2.441   | 0.091   | Exp-EMT-up              |
| Wnt11    | 2.366   | 0.099   | NA                      |
| Cav2     | 2.341   | 0.098   | Exp-EMT-down            |
| Col5a2   | 2.309   | 0.102   | Exp-EMT-up              |
| Fn1      | 2.309   | 0.102   | Exp-EMT-up              |
| Mmp2     | 2.097   | 0.125   | Exp-EMT-up              |
| Col3a1   | 1.977   | 0.124   | Exp-EMT-up              |
| Timp1    | 1.971   | 0.143   | Exp-EMT-up              |
| Sip1     | 1.933   | 0.109   | NA                      |
| Snai3    | 1.933   | 0.117   | Exp-EMT-up              |
| Tgfb2    | 1.889   | 0.149   | NA                      |
| Mmp3     | 1.686   | 0.187   | Exp-EMT-up              |
| Wnt5a    | 1.678   | 0.19    | Exp-EMT-up              |
| Il1rn    | 1.622   | 0.203   | Exp-EMT-down            |
| Col1a2   | 1.603   | 0.207   | Exp-EMT-up              |
| Tmem132a | 1.58    | 0.21    | Exp-EMT-up              |
| Notch1   | 1.578   | 0.212   | NA                      |
| Mitf     | 1.574   | 0.208   | Exp-EMT-down            |
| Spp1     | 1.549   | 0.219   | Exp-EMT-down            |
| Zeb2     | 1.498   | 0.197   | NA                      |
| Vcan     | 1.39    | 0.217   | Exp-EMT-up              |
| Snai2    | 1.387   | 0.259   | Exp-EMT-up              |
| Serpine1 | 1.375   | 0.219   | Exp-EMT-up              |
| Fzd7     | 1.332   | 0.269   | NA                      |
| Tgfb1    | 1.325   | 0.277   | NA                      |
| Tmeff1   | 1.305   | 0.283   | NA                      |
| Bmp1     | 1.3     | 0.276   | Exp-EMT-up              |
| Mmp9     | 1.267   | 0.294   | Exp-EMT-up              |
| Cdh2     | 1.223   | 0.309   | NA                      |
| Tgfb3    | 1.2     | 0.316   | NA                      |
| Jag1     | 1.192   | 0.317   | NA                      |
| Krt14    | 1.065   | 0.365   | NA                      |
| Gsc      | 0.896   | 0.435   | NA                      |

  

| (continue) | t-score | p-value | Expected EMT expression |
|------------|---------|---------|-------------------------|
| Smad2      | 0.883   | 0.431   | NA                      |
| Ilk        | 0.847   | 0.457   | NA                      |
| Gng11      | 0.769   | 0.479   | Exp-EMT-up              |
| Zeb1       | 0.732   | 0.506   | NA                      |
| Ptp4a1     | 0.653   | 0.557   | NA                      |
| Esr1       | 0.605   | 0.579   | NA                      |
| Krt7       | 0.583   | 0.585   | NA                      |
| Tspan13    | 0.577   | 0.592   | NA                      |
| Cald1      | 0.45    | 0.681   | Exp-EMT-up              |
| Gsk3b      | 0.326   | 0.755   | NA                      |
| Vim        | 0.295   | 0.785   | Exp-EMT-up              |
| Rgs2       | 0.174   | 0.87    | Exp-EMT-down            |
| Egfr       | 0.139   | 0.894   | NA                      |
| Stat3      | 0.123   | 0.907   | NA                      |
| Itgav      | -0.115  | 0.913   | Exp-EMT-up              |
| Camk2n1    | -0.15   | 0.886   | Exp-EMT-up              |
| Ptk2       | -0.187  | 0.858   | NA                      |
| Akt1       | -0.19   | 0.856   | NA                      |
| Sox10      | -0.268  | 0.803   | Exp-EMT-up              |
| Itga5      | -0.374  | 0.73    | Exp-EMT-up              |
| Tfpi2      | -0.447  | 0.674   | Exp-EMT-down            |
| Snai1      | -0.469  | 0.659   | Exp-EMT-up              |
| Nodal      | -0.996  | 0.393   | NA                      |
| Steap1     | -1.037  | 0.341   | Exp-EMT-up              |
| Plek2      | -1.182  | 0.317   | NA                      |
| Fgfbp1     | -1.248  | 0.282   | Exp-EMT-down            |
| Itgb1      | -1.282  | 0.248   | NA                      |
| Ctnnb1     | -1.397  | 0.244   | NA                      |
| Dsp        | -1.552  | 0.175   | Exp-EMT-down            |
| Pppde2     | -1.556  | 0.183   | NA                      |
| Pdgfrb     | -1.572  | 0.167   | NA                      |
| Nudt13     | -1.633  | 0.155   | Exp-EMT-down            |
| Ahnak      | -1.69   | 0.142   | Exp-EMT-up              |
| Cdh1       | -1.723  | 0.137   | Exp-EMT-down            |
| ErbB3      | -1.734  | 0.137   | NA                      |
| Dsc2       | -2.221  | 0.096   | NA                      |
| Vps13a     | -2.509  | 0.047   | Exp-EMT-up              |
| Ocln       | -2.894  | 0.028   | Exp-EMT-down            |
| Mst1r      | -3.812  | 0.011   | NA                      |
| F11r       | -5.472  | 0.002   | NA                      |
| Rac1       | -5.857  | 0.001   | NA                      |
| Krt19      | -6.86   | 0.003   | Exp-EMT-down            |



**Supplementary Table 4: Quantification of the triple immunofluorescence images presented in Figure 5 and Figure 6**

This tables shows the total count of cells for each staining in each categories, leading to the figure 5C and 6F. Statistical analysis was performed on this contingency table using a chi-square test. P-value denotes the probability of rejecting the hypothesis of independence.

Images on which the quantification was performed are accessible on <https://cid.curie.fr> , login readerNCom password Welcome!1

among GFP+ only **Figure 5C left**

|       | CK+ | CK- | total |
|-------|-----|-----|-------|
| SMA+  | 6   | 126 | 132   |
| SMA-  | 537 | 18  | 555   |
| total | 543 | 144 | 687   |

  

|       | E+  | E-  | total |
|-------|-----|-----|-------|
| ZEB1+ | 4   | 241 | 245   |
| ZEB1- | 425 | 21  | 446   |
| total | 429 | 262 | 691   |

  

|       | E+  | E-  | total |
|-------|-----|-----|-------|
| VIM+  | 30  | 101 | 131   |
| VIM-  | 356 | 5   | 361   |
| total | 386 | 106 | 492   |

among GFP+ only **Figure 5C right**

|       | ZEB+ | ZEB- | total |
|-------|------|------|-------|
| SMA+  | 60   | 8    | 68    |
| SMA-  | 72   | 128  | 200   |
| total | 132  | 136  | 268   |

among GFP+ only **Figure 6 F**

|       | E+  | E-  | total |
|-------|-----|-----|-------|
| Ph3+  | 71  | 6   | 77    |
| Ph3-  | 514 | 268 | 782   |
| total | 585 | 274 | 859   |
